# Supplementary material for: Efficient photocatalytic degradation of bisphenol A and dye pollutants over BiOI/Zn2SnO4 heterojunction photocatalyst
Source: Royal Society of Chemistry journal article supplement (doi:10.1039/c4ra13990a), 2015-01-01
Supplement: c4ra13990a1.pdf [file c4ra13990a1.pdf]

## Supplementary Materials

### Efficient photocatalytic degradation of bisphenol A and dye pollutants over BiOI/Zn<sub>2</sub>SnO<sub>4</sub> heterojunction photocatalyst

Tao Yan,<sup>a,b</sup> Hongye Liu,<sup>c</sup> Meng Sun,<sup>a</sup> Xiaodong Wang,<sup>c</sup> Mengmeng Li,<sup>c</sup> Qing Yan,<sup>a</sup> Wenguo Xu,<sup>b</sup> and Bin Du<sup>\*a</sup>

<sup>a</sup> School of Resources and Environment, University of Jinan, Shandong Provincial Engineering Technology Research Center for Ecological Carbon Sink and Capture Utilization, Jinan250022, P.R. China. Fax: +86 531-82765969; Tel:+86 531-82769235; E-mail: binduujn@163.com

<sup>b</sup> School of Chemistry, Beijing Institute of Technology, Beijing 100081, P.R. China.

<sup>c</sup> School of Civil Engineering and Architecture, University of Jinan, Jinan 250022, P.R. China.

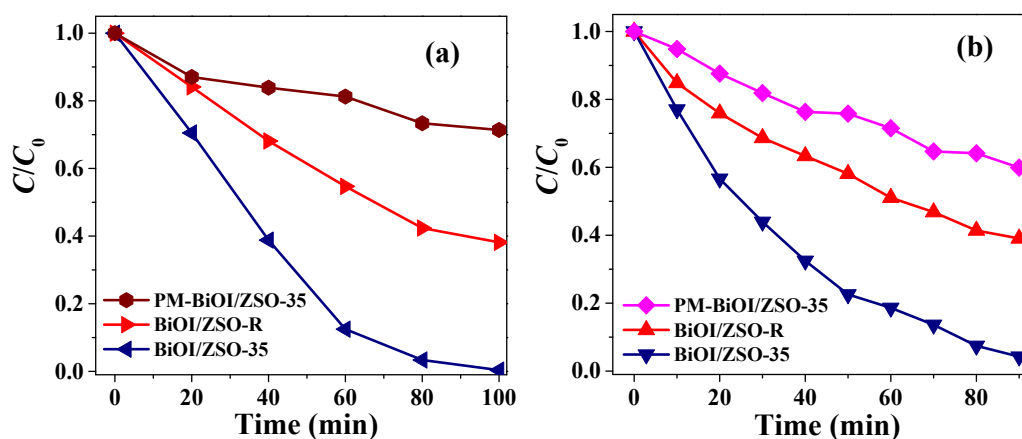

**Figure S1 Comparison the activity of BiOI/ZSO-35, PM-BiOI/ZSO-35 and BiOI/ZSO-R towards MB degradation under visible light (a) and UV light (b) irradiation.**
